# Supplementary material for: Cell Development Deficiency and Gene Expression Dysregulation of Trisomy 21 Retina Revealed by Single-Nucleus RNA Sequencing
Source: Front Bioeng Biotechnol. 2020 Sep 23;8:564057. doi: 10.3389/fbioe.2020.564057 (PMC7538860; doi:10.3389/fbioe.2020.564057)
Supplement: Supplementary Table 6 — List of receptor-ligand pairs present in MGs and other clusters. [file Table_6.XLSX]

## Sheet: R3L0
Supplementary Table 6. List of receptor-ligand pairs present in MGs and other clusters.
Receptors of cluster 3 and ligands of cluster0
Ligand.ApprovedSymbol	Receptor.ApprovedSymbol
CALR	ITGAV
CNTN4	PTPRG
CTGF	ERBB4
CYR61	ITGAV
FBN1	ITGAV
FN1	ITGAV
FN1	ITGB8
IGF1	IGF1R
NID1	ITGAV
RTN4	LINGO1
SEMA5A	MET
SLIT2	ROBO1

## Sheet: R3L4
Supplementary Table 6. List of receptor-ligand pairs present in MGs and other clusters.
Receptors of cluster 3 and ligands of cluster4
Ligand.ApprovedSymbol	Receptor.ApprovedSymbol
APP	LRP1
CALR	ITGAV
CALR	LRP1
CNTN4	PTPRG
COL1A1	DDR2
COL3A1	DDR2
CTGF	LRP1
CYR61	ITGAV
EDN3	EDNRA
EFEMP1	EGFR
EFNA5	EPHA3
FBN1	ITGAV
FN1	ITGA8
FN1	ITGAV
HSP90AA1	EGFR
IGF1	IGF1R
JAG1	NOTCH3
MDK	LRP1
NID1	ITGAV
PLAT	LRP1
PSAP	LRP1
RTN4	LINGO1
SEMA3D	NRP1
SLIT2	ROBO1
VCAN	EGFR

## Sheet: R3L7
Supplementary Table 6. List of receptor-ligand pairs present in MGs and other clusters.
Receptors of cluster 3 and ligands of cluster7
Ligand.ApprovedSymbol	Receptor.ApprovedSymbol
BMP5	BMPR1A
CALR	ITGAV
CNTN4	PTPRG
COL18A1	ITGB1
COL1A1	DDR2
COL1A1	ITGB1
COL3A1	DDR2
CYR61	ITGAV
EFNA5	EPHA6
FBLN1	ITGB1
FBN1	ITGAV
FBN1	ITGB1
FN1	ITGA8
FN1	ITGAV
FN1	ITGB1
IGF1	IGF1R
LAMA2	ITGB1
NID1	ITGAV
NLGN1	NRXN1
RSPO3	LGR4
RTN4	LINGO1
SLIT2	ROBO1
SLIT2	ROBO2
SLIT3	ROBO2
TGM2	ITGB1
TIMP2	ITGB1
VCAN	ITGB1

## Sheet: R3L2
Supplementary Table 6. List of receptor-ligand pairs present in MGs and other clusters.
Receptors of cluster 3 and ligands of cluster2
Ligand.ApprovedSymbol	Receptor.ApprovedSymbol
CALR	ITGAV
CNTN4	PTPRG
COL1A1	DDR2
COL3A1	DDR2
CYR61	ITGAV
FBN1	ITGAV
FN1	ITGAV
FN1	SDC2
IGF1	IGF1R
NID1	ITGAV
NLGN1	NRXN3
RTN4	LINGO1
SLIT2	ROBO1

## Sheet: R3L5
Supplementary Table 6. List of receptor-ligand pairs present in MGs and other clusters.
Receptors of cluster 3 and ligands of cluster5
Ligand.ApprovedSymbol	Receptor.ApprovedSymbol
CALR	ITGAV
CNTN4	PTPRG
CTGF	ERBB4
CYR61	ITGAV
EFEMP1	EGFR
FBN1	ITGAV
FN1	ITGAV
HSP90AA1	EGFR
IGF1	IGF1R
MDK	LRP2
NID1	ITGAV
NLGN1	NRXN3
PTN	PTPRS
RSPO3	LGR4
RTN4	LINGO1
SLIT2	ROBO1
VCAN	EGFR

## Sheet: R3L6
Supplementary Table 6. List of receptor-ligand pairs present in MGs and other clusters.
Receptors of cluster 3 and ligands of cluster6
Ligand.ApprovedSymbol	Receptor.ApprovedSymbol
ADM	CALCRL
ANGPT1	TEK
APP	CD74
CALR	ITGAV
CNTN4	PTPRG
COL18A1	ITGB1
COL18A1	KDR
COL1A1	ITGB1
CYR61	ITGAV
FBLN1	ITGB1
FBN1	ITGAV
FBN1	ITGB1
FN1	ITGAV
FN1	ITGB1
IGF1	IGF1R
LAMA2	ITGB1
NID1	ITGAV
PTN	PTPRB
RTN4	LINGO1
SEMA3D	NRP1
SLIT2	ROBO1
SLIT2	ROBO4
TGM2	ITGB1
TIMP2	ITGB1
TIMP3	KDR
VCAN	ITGB1

## Sheet: R3L3
Supplementary Table 6. List of receptor-ligand pairs present in MGs and other clusters.
Receptors of cluster 3 and ligands of cluster3
Ligand.ApprovedSymbol	Receptor.ApprovedSymbol
APP	LRP1
CALR	ITGAV
CALR	LRP1
CNTN4	PTPRG
COL1A1	DDR2
COL3A1	DDR2
CTGF	LRP1
CYR61	ITGAV
EDN3	EDNRA
EFEMP1	EGFR
EFNA5	EPHA3
FBN1	ITGAV
FN1	ITGAV
FN1	SDC2
HSP90AA1	EGFR
IGF1	IGF1R
MDK	LRP1
NID1	ITGAV
NLGN1	NRXN3
PLAT	LRP1
PSAP	LRP1
RTN4	LINGO1
SEMA3D	NRP1
SLIT2	ROBO1
VCAN	EGFR
